# Supplementary material
Source: PubMed Central journal article supplement (PMC2846185)

### Supporting Information

Supplemental Figure 1. Transfer of plugs into electrospray emitter. Sequence of photographs showing a plug approaching emitter tip (left), entering (middle), and washing out (right) taken at 12 s intervals. Teflon tubing is 150  $\mu\text{m}$  i.d., emitter capillary 50  $\mu\text{m}$  i.d., and plugs 50 nL. Flow rate was 200 nL/min.

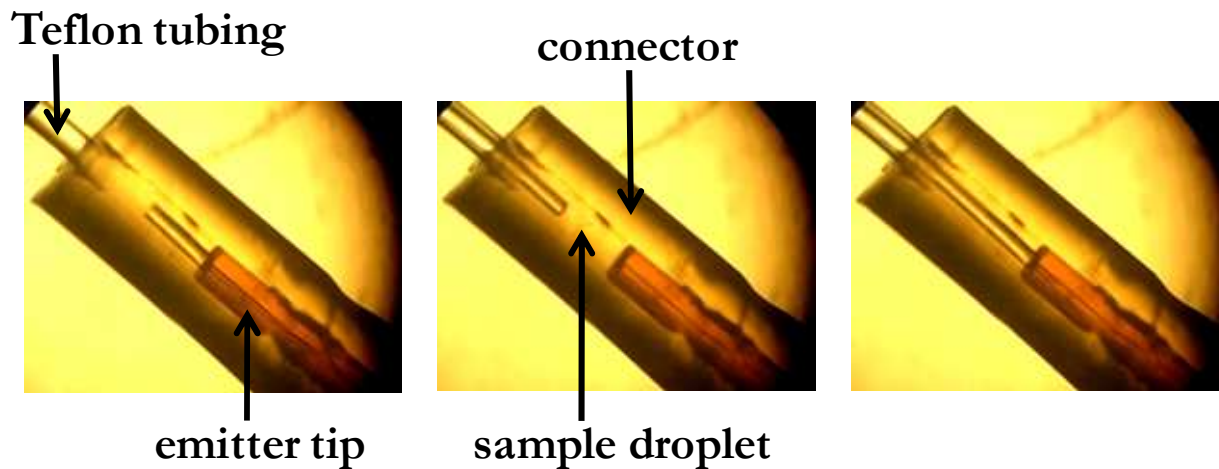

Supplement: NIHMS132545-supplement-1.pdf [file NIHMS132545-supplement-1.pdf]
