# Supplementary material
Source: PubMed Central journal article supplement (PMC2846185)
Supplement: NIHMS132545-supplement-1_si_001.pdf [file NIHMS132545-supplement-1_si_001.pdf]

## Supporting Information

Supplemental Figure 1. Transfer of plugs into electrospray emitter. Sequence of photographs showing a plug approaching emitter tip (left), entering (middle), and washing out (right) taken at 12 s intervals. Teflon tubing is 150  $\mu\text{m}$  i.d., emitter capillary 50  $\mu\text{m}$  i.d., and plugs 50 nL. Flow rate was 200 nL/min.

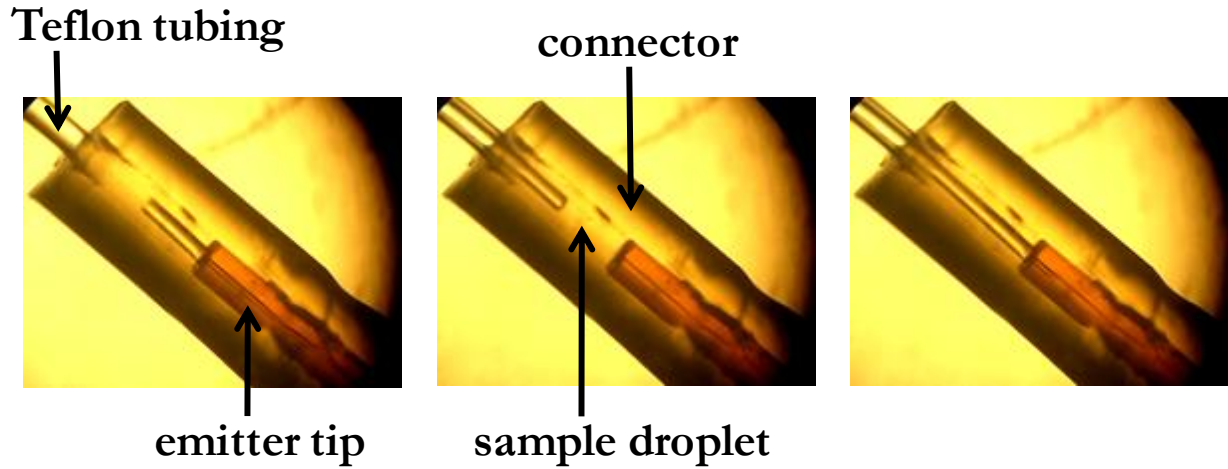



## Literature Cited

- (1) Chen, D. L. L.; Ismagilov, R. F. *Curr. Opin. Chem. Biol.* **2006**, *10*, 226-231.
- (2) Song, H.; Chen, D. L.; Ismagilov, R. F. *Angew. Chem.-Int. Edit.* **2006**, *45*, 7336-7356.
- (3) Linder, V.; Sia, S. K.; Whitesides, G. M. *Anal. Chem.* **2005**, *77*, 64-71.
- (4) Chabert, M.; Dorfman, K. D.; de Cremoux, P.; Roeraade, J.; Viovy, J. L. *Anal. Chem.* **2006**, *78*, 7722-7728.
- (5) Khan, S. A.; Gunther, A.; Schmidt, M. A.; Jensen, K. F. *Langmuir* **2004**, *20*, 8604-8611.
- (6) Garstecki, P.; Fuerstman, M. J.; Stone, H. A.; Whitesides, G. M. *Lab Chip* **2006**, *6*, 693-693.
- (7) Hashimoto, M.; Shevkoplyas, S. S.; Zasonska, B.; Szymborski, T.; Garstecki, P.; Whitesides, G. M. *Small* **2008**, *4*, 1795-1805.
- (8) Fidalgo, L. M.; Abell, C.; Huck, W. T. S. *Lab Chip* **2007**, *7*, 984-986.
- (9) Sgro, A. E.; Allen, P. B.; Chiu, D. T. *Anal. Chem.* **2007**, *79*, 4845-4851.
- (10) Kuo, J. S.; Spicar-Mihalic, P.; Rodriguez, I.; Chiu, D. T. *Langmuir* **2003**, *19*, 250-255.
- (11) He, M.; Kuo, J. S.; Chiu, D. T. *Langmuir* **2006**, *22*, 6408-6413.
- (12) Chen, D.; Du, W. B.; Liu, Y.; Liu, W. S.; Kuznetsov, A.; Mendez, F. E.; Philipson, L. H.; Ismagilov, R. F. *Proc. Natl. Acad. Sci. U. S. A.* **2008**, *105*, 16843-16848.
- (13) Song, H.; Tice, J. D.; Ismagilov, R. F. *Angew. Chem.-Int. Edit.* **2003**, *42*, 768-772.
- (14) Adamson, D. N.; Mustafi, D.; Zhang, J. X. J.; Zheng, B.; Ismagilov, R. F. *Lab Chip* **2006**, *6*, 1178-1186.
- (15) Link, D. R.; Anna, S. L.; Weitz, D. A.; Stone, H. A. *Phys. Rev. Lett.* **2004**, *92*, 4.
- (16) Shestopalov, I.; Tice, J. D.; Ismagilov, R. F. *Lab Chip* **2004**, *4*, 316-321.
- (17) Song, H.; Li, H. W.; Munson, M. S.; Van Ha, T. G.; Ismagilov, R. F. *Anal. Chem.* **2006**, *78*, 4839-4849.
- (18) He, M. Y.; Sun, C. H.; Chiu, D. T. *Anal. Chem.* **2004**, *76*, 1222-1227.
- (19) Huang, K. D.; Yang, R. J. *Electrophoresis* **2008**, *29*, 4862-4870.
- (20) Song, H.; Ismagilov, R. F. *J. Am. Chem. Soc.* **2003**, *125*, 14613-14619.
- (21) Snyder, L. R. *Anal. Chim. Acta* **1980**, *114*, 3-18.
- (22) Furman, W. B. *Continuous-Flow Analysis. Theory and Practice*: New York, 1976.
- (23) Edgar, J. S.; Pabbati, C. P.; Lorenz, R. M.; He, M. Y.; Fiorini, G. S.; Chiu, D. T. *Anal. Chem.* **2006**, *78*, 6948-6954.
- (24) Roman, G. T.; Wang, M.; Shultz, K. N.; Jennings, C.; Kennedy, R. T. *Anal. Chem.* **2008**, *80*, 8231-8238.
- (25) Kautz, R. A.; Goetzinger, W. K.; Karger, B. L. *J. Comb. Chem.* **2005**, *7*, 14-20.
- (26) Hatakeyama, T.; Chen, D. L. L.; Ismagilov, R. F. *J. Am. Chem. Soc.* **2006**, *128*, 2518-2519.
- (27) Karger, B. L.; Kirby, D. P.; Vouros, P.; Foltz, R. L.; Hidy, B. *Anal. Chem.* **1979**, *51*, 2324-2328.
- (28) Noguchi, O.; Oshima, M.; Motomizu, S. *Anal. Sci.* **2008**, *24*, 631-635.
- (29) Westphall, M. S.; Jorabchi, K.; Smith, L. M. *Anal. Chem.* **2008**, *80*, 5847-5853.
- (30) Fidalgo, L. M.; Whyte, G.; Ruotolo, B. T.; Benesch, J. L. P.; Stengel, F.; Abell, C.; Robinson, C. V.; Huck, W. T. S. *Angew. Chem.-Int. Edit.* **2009**, *48*, 4.
- (31) Schneider, B. B.; Javaheri, H.; Covey, T. R. *Rapid Commun. Mass Spectrom.* **2006**, *20*, 1538-1544.
- (32) Valaskovic, G. A.; Utle, L.; Lee, M. S.; Wu, J. T. *Rapid Commun. Mass Spectrom.* **2006**, *20*, 1087-1096.
